# Supplementary material for: Intercalation–exfoliation processes during ionic exchange reactions from sodium lepidocrocite-type titanate toward a proton-based trititanate structure
Source: Royal Society of Chemistry journal article supplement (doi:10.1039/d1cp00352f), 2021-01-01
Supplement: d1cp00352f1.pdf [file d1cp00352f1.pdf]

## Electronic Supporting Information

# Intercalation-exfoliation processes during ionic exchange reaction from the sodium lepidocrocite-type titanate toward the proton-based trititanate structure

Seongkoo Kang,<sup>a,b</sup> Serge Durand-Vidal,<sup>a,b\*</sup> Jean-Claude Badot,<sup>b,c</sup> Christophe Legein,<sup>d</sup> Monique Body,<sup>d</sup> Olaf J. Borkiewicz,<sup>e</sup> Olivier Dubrunfaut,<sup>f</sup> and Damien Dambournet<sup>a,b\*</sup>

<sup>a</sup> Sorbonne Université, CNRS, Physicochimie des Electrolytes et Nanosystèmes Interfaciaux, PHENIX, F-75005, Paris, France

<sup>b</sup> Réseau sur le Stockage Electrochimique de l'Energie (RS2E), FR CNRS 3459, 80039 Amiens, France

<sup>c</sup> Chimie ParisTech, PSL Research University, CNRS, Institut de Recherche de Chimie Paris, 11 rue Pierre et Marie Curie, 75005 Paris, France

<sup>d</sup> Institut des Molécules et Matériaux du Mans (IMMM) - UMR 6283 CNRS, Le Mans Université, Avenue Olivier Messiaen, 72805 Le Mans Cedex 9, France

<sup>e</sup> X-ray Science Division, Advanced Photon Source, Argonne National Laboratory, Argonne, Illinois 60439, United States

<sup>f</sup> GeePs Group of Electrical Engineering – Paris, UMR CNRS 8507, CentraleSupélec, Sorbonne Université, Univ Paris-Sud, Université Paris-Saclay, 11 rue Joliot-Curie, 91192 Gif-sur Yvette, France

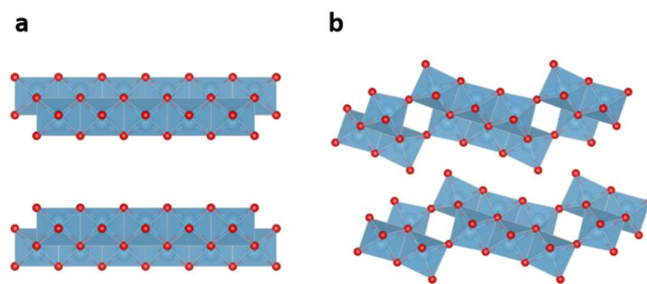

**Fig. S1.** Structural representation of a) lepidocrocite and b) trititanate structure.

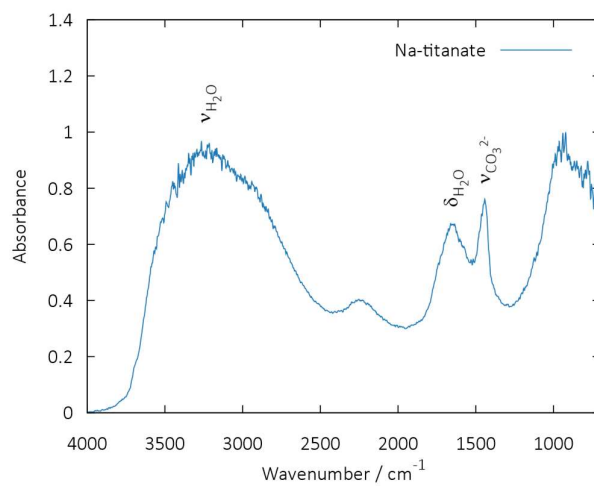

**Fig. S2.** ATR FT-IR spectrum of Na-titanate.

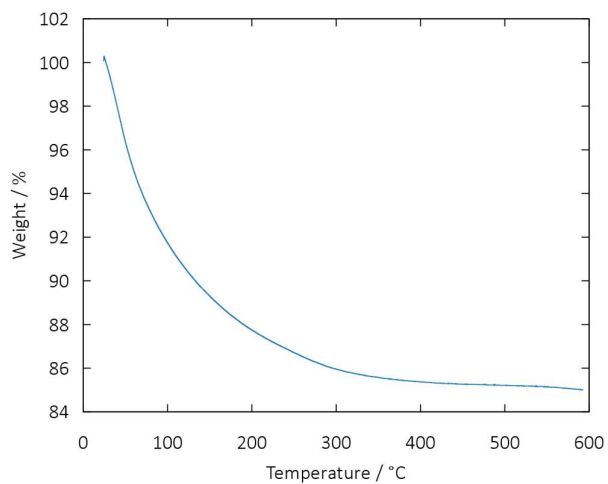

**Fig. S3.** Thermogravimetric analysis curve of Na-titanate.

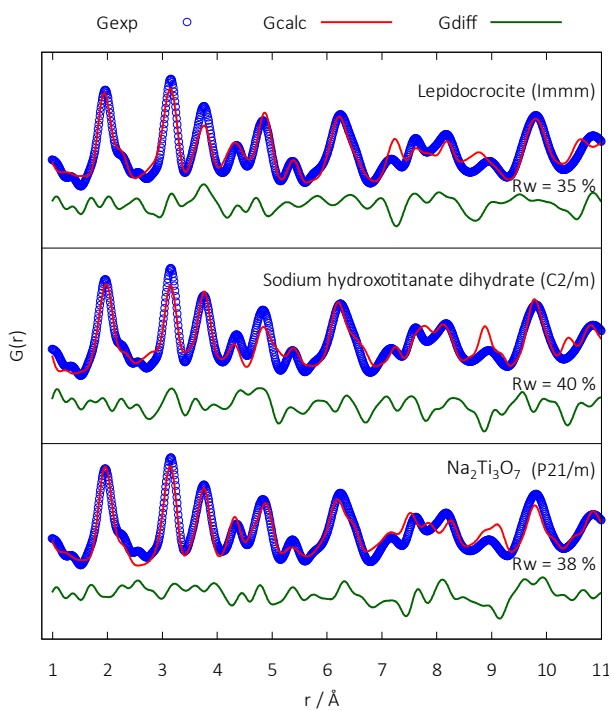

**Fig. S4.** PDF refinements of Na-titanate using different structural models.

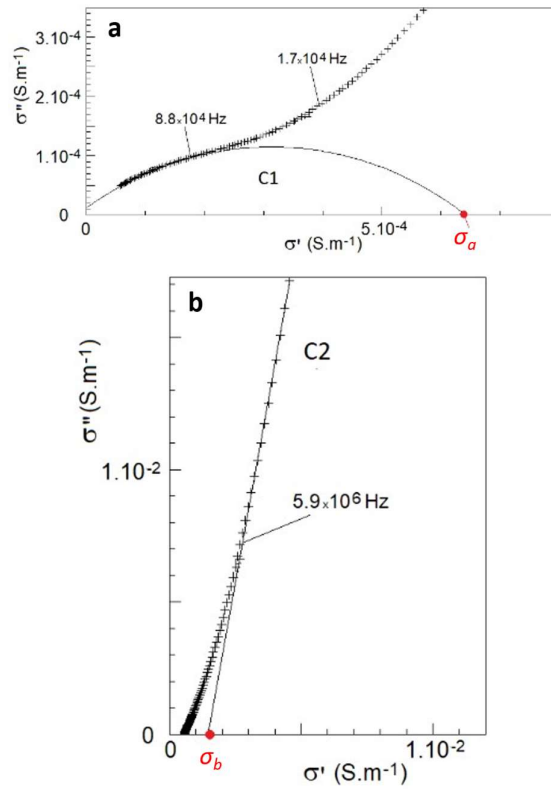

**Fig. S5.** Nyquist plots of conductivity at RT.

- a) Low-frequency contribution (double layer capacitance) C1 fitted with a circular arc.  
 b) Grain bulk contribution fitted with a straight line obtained after the subtraction of C1.  
 $\sigma_a = 6.4 \cdot 10^{-4}$  S/m and  $\sigma_b = 1.5 \cdot 10^{-3}$  S/m are sample and grain conductivities, respectively.

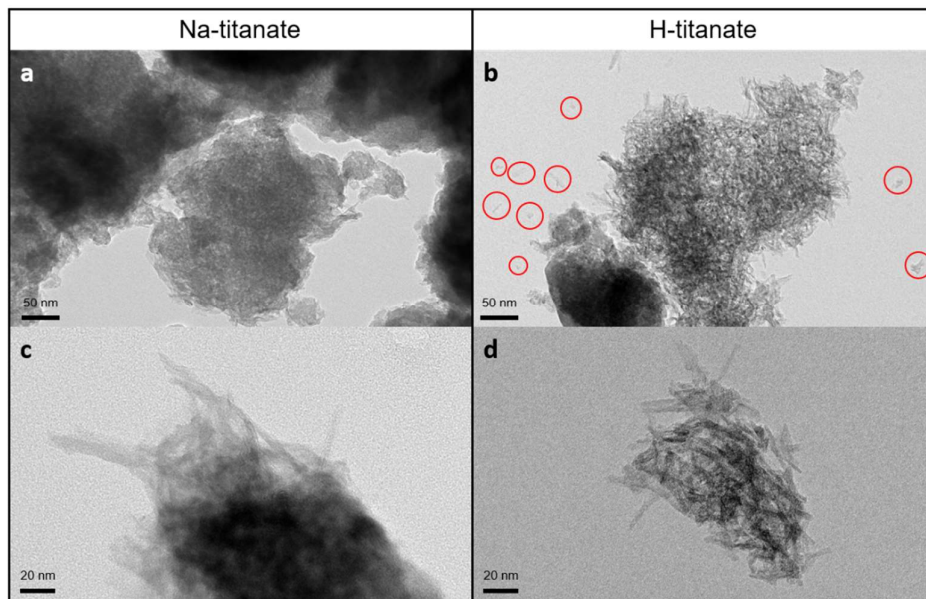

**Fig. S6.** TEM images of Na-titanate (a, c) and H-titanate (b, d).

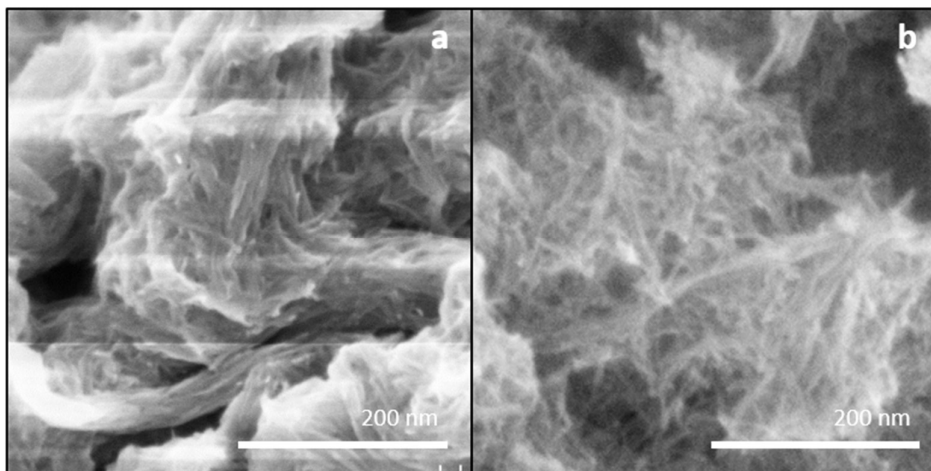

**Fig. S7.** SEM images of Na-titanate (a) and H-titanate (b)

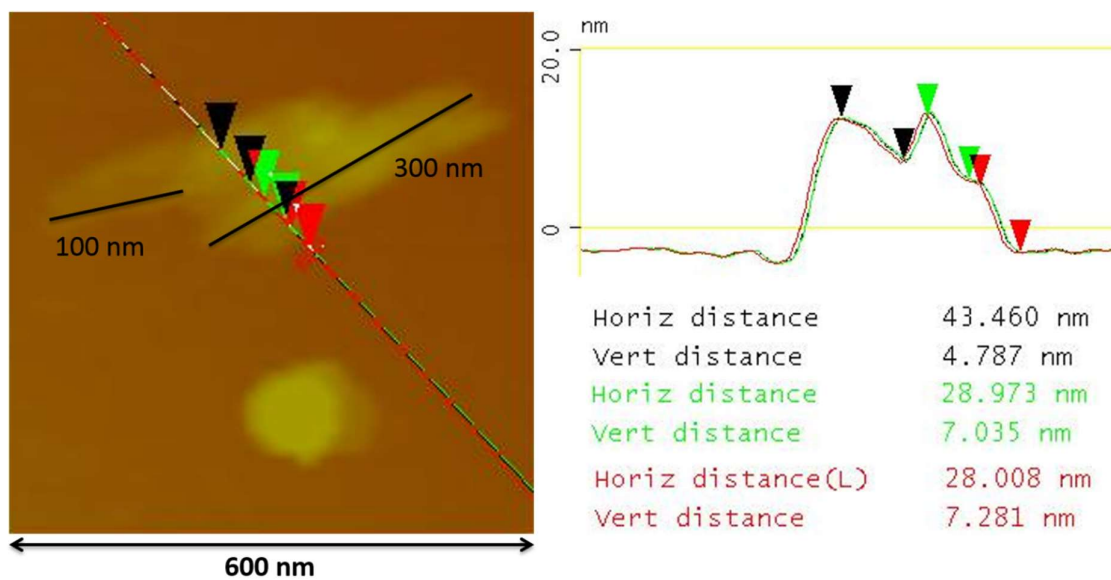

**Fig. S8.** Atomic force micrograph with a section of an aggregate of elongated particles of H-titanate. Horizontal and vertical distances are between black, green, and red arrows. The longest sizes of two elongated particles are given in the picture.

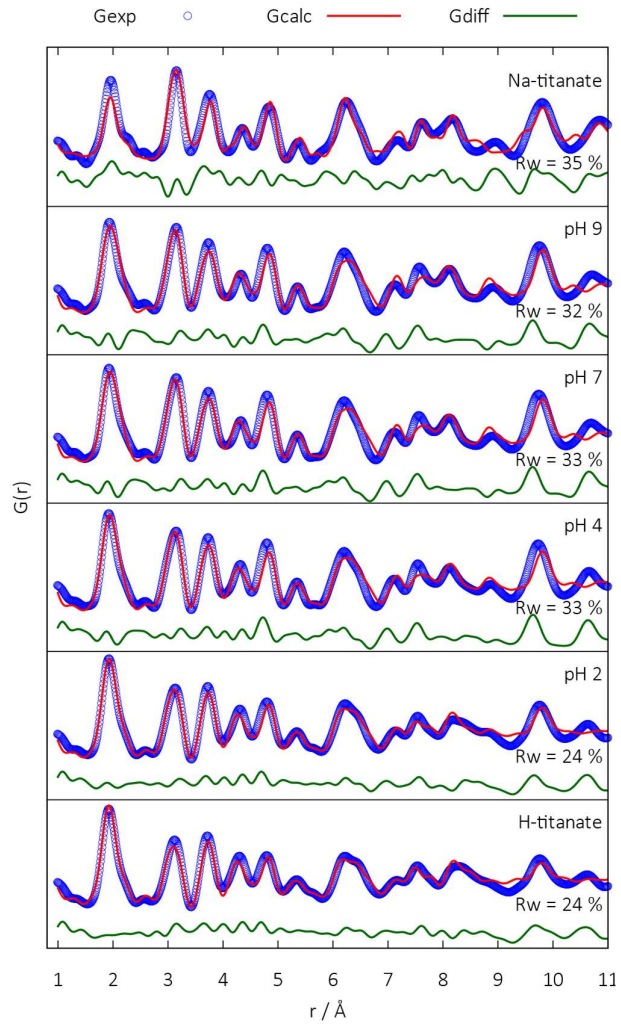

**Fig. S9.** Real-space refinements of the PDFs of the samples collected at different pH values.

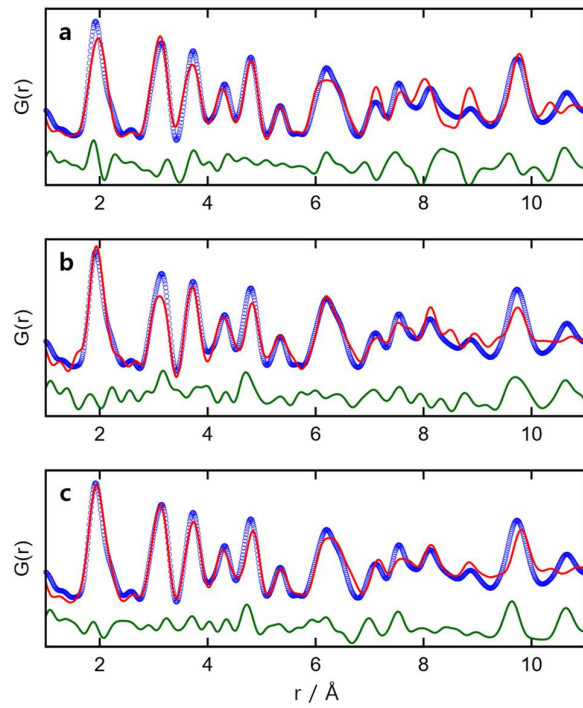

**Fig. S10.** Real-space refinements of the PDF of the sample collected at pH 4 using lepidocrocite (a), trititanate (b), and both models (c).

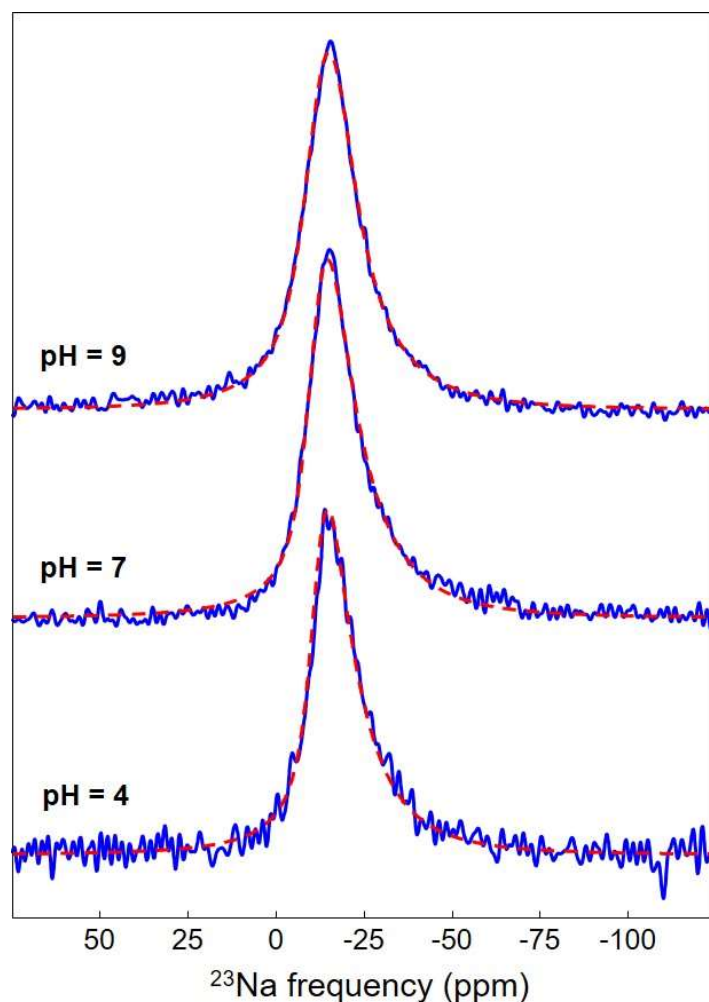

**Fig. S11.** Experimental (blue) and fitted using the Gaussian Isotropic Model<sup>1</sup> (red dashed line) <sup>23</sup>Na MAS (44 kHz) NMR spectra of three samples collected at different pH values. This model involves a Gaussian distribution of chemical shifts and a distribution of quadrupolar interactions. The parameters used for these fits are reported in **Table S1**.

**Table S1.** Average isotropic chemical shift ( $\langle\delta_{\text{iso}}\rangle$ /ppm), full width at half maximum (FWHM) of the isotropic chemical shift Gaussian distribution ( $\Delta\text{CS}$ /ppm), average quadrupolar frequency ( $\langle\nu_{\text{Q}}\rangle$ /kHz) and quadrupolar constant ( $\langle C_{\text{Q}}\rangle$ /MHz) used to fit the <sup>23</sup>Na MAS NMR spectra of three samples collected at different pH values (see **Fig. S8**).

| pH | $\langle\delta_{\text{iso}}\rangle$ | $\Delta\text{CS}$ | $\langle\nu_{\text{Q}}\rangle$ | $\langle C_{\text{Q}}\rangle$ |
|----|-------------------------------------|-------------------|--------------------------------|-------------------------------|
| 9  | -12.6                               | 9.1               | 515                            | 1.03                          |
| 7  | -11.3                               | 7.0               | 668                            | 1.34                          |
| 4  | -11.7                               | 5.8               | 631                            | 1.26                          |

<sup>1</sup> D. Massiot, F. Fayon, M. Capron, I. King, S. Le Calvé, B. Alonso, J.-O. Durand, B. Bujoli, Z. Gan and G. Hoatson, Modelling one- and two-dimensional solid-state NMR spectra: Modelling 1D and 2D solid-state NMR spectra, *Magn. Reson. Chem.*, 2002, **40**, 70–76.



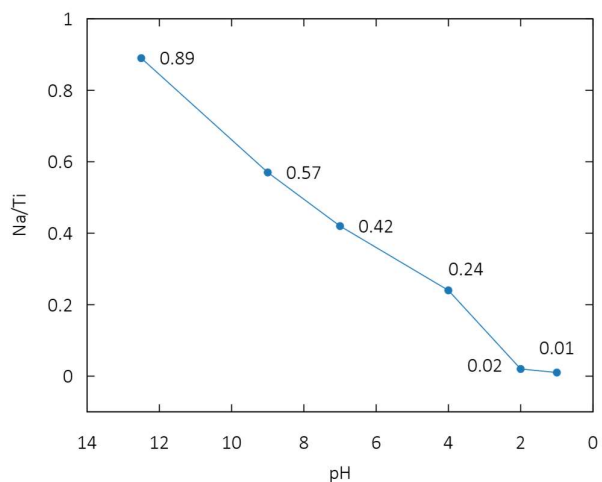

**Fig. S12.** Na/Ti ratio quantified using energy dispersive X-ray spectroscopy for the samples collected at different pH.

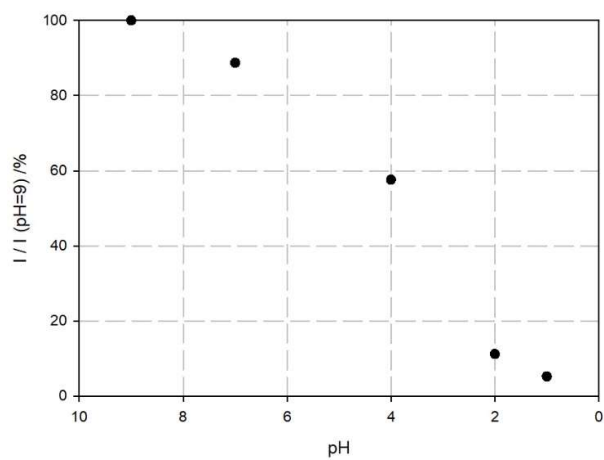

**Fig. S13.** Intensity / Intensity (pH = 9) ratio of the  $^{23}\text{Na}$  non-normalized NMR spectra for the samples collected at different pH. Intensity estimated as the area under the curve of the fit of each non-normalized spectrum. The  $^{23}\text{Na}$  non-normalized spectra correspond, for each sample, to the same number of scans and the same sample mass in the rotor.

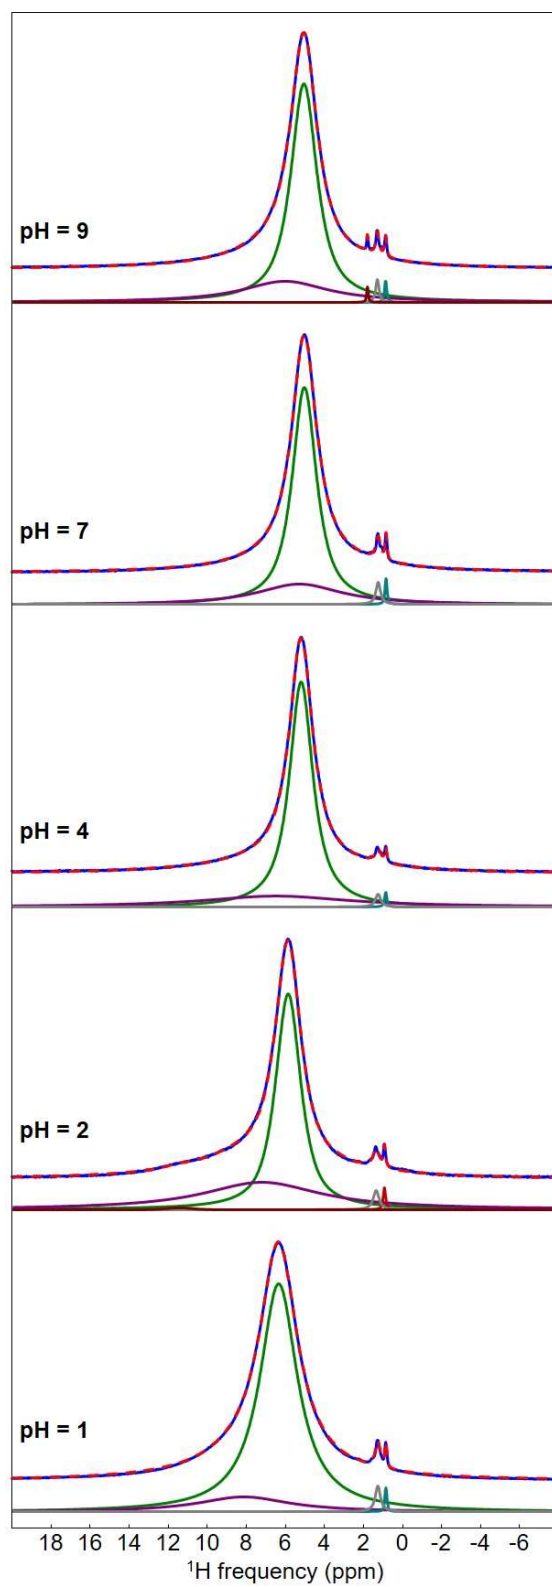

**Fig. S14.** Experimental (blue) and fitted (red dashed line)  $^1\text{H}$  MAS (60 kHz) NMR spectra of the samples collected at different pH. The individual resonances used for these fits are shown below (see **Table S2**).

**Table S2.** Isotropic chemical shifts ( $\delta_{\text{iso}}$ /ppm), line widths (LW/ppm), relative intensities (I/%), of the NMR resonances used for the fit of the  $^1\text{H}$  MAS (64 kHz) NMR spectra of the samples collected at different pH (see **Fig. S11**).

| pH | $\delta_{\text{iso}}$ | LW   | I    |
|----|-----------------------|------|------|
| 1  | 0.85                  | 0.13 | 0.4  |
|    | 1.26                  | 0.31 | 1.3  |
|    | 6.3                   | 2.3  | 84.9 |
|    | 8.1                   | 5.7  | 13.4 |
| 2  | 0.92                  | 0.14 | 0.6  |
|    | 1.35                  | 0.36 | 1.3  |
|    | 5.9                   | 1.6  | 60.3 |
|    | 7.2                   | 7.3  | 37.5 |
|    | 11.4                  | 1.5  | 0.3  |
| 4  | 0.85                  | 0.14 | 0.5  |
|    | 1.25                  | 0.34 | 1.0  |
|    | 5.2                   | 1.5  | 74.6 |
|    | 6.5                   | 9.1  | 23.9 |
| 7  | 0.84                  | 0.12 | 0.7  |
|    | 1.24                  | 0.28 | 1.4  |
|    | 5.0                   | 1.5  | 73.5 |
|    | 5.3                   | 5.3  | 24.4 |
| 9  | 0.86                  | 0.13 | 0.6  |
|    | 1.28                  | 0.20 | 1.0  |
|    | 1.8                   | 0.09 | 0.3  |
|    | 5.1                   | 1.6  | 74.5 |
|    | 6.0                   | 5.4  | 23.6 |

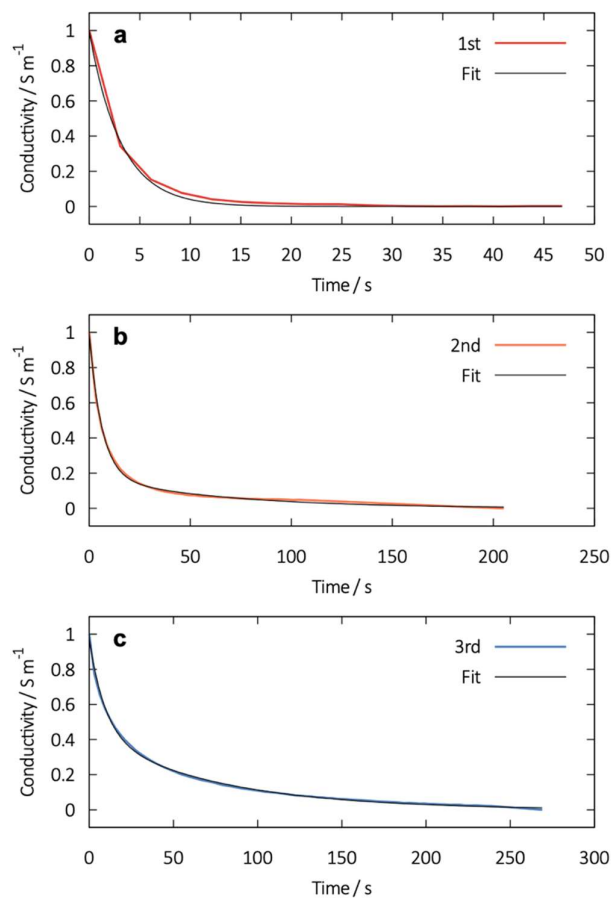

**Fig. S15.** Results of to fit the decay of the ionic conductivity during the Na<sup>+</sup>-H<sup>+</sup> ionic exchange.
